# Supplementary material for: Simultaneous determination of three antituberculosis drugs in the serum of patients with spinal tuberculosis by capillary electrophoresis
Source: Royal Society of Chemistry journal article supplement (doi:10.1039/d1ay00711d), 2021-01-01
Supplement: d1ay00711d1.pdf [file d1ay00711d1.pdf]

**Supplementary Table S1.** Comparison of different methods for the simultaneous quantification of antibiotics.

| Compounds | Reference   | Method   | LOQ (µg/mL) | Linear range (µg/ml) | Pros and cons                                                                    |
|-----------|-------------|----------|-------------|----------------------|----------------------------------------------------------------------------------|
| INH       | This work   | MEKC-DAD | 0.670       | 1.215-24.300         | Simple and inexpensive                                                           |
|           | 31          | CE-CL    | --          | 1-200                | Only examined two antibiotics simultaneous (with <i>p</i> -aminosalicylic acid). |
|           | 30,32,34,35 | CZE-UV   | 2.50        | 40-120               | Limited sensitivity                                                              |
|           | 19,24-29    | HPLC-UV  | 0.2         | 0.2-40               | Complicated and onerous in time and money                                        |
| PZA       | This work   | MEKC-DAD | 0.400       | 2.167-43.340         | Simple and inexpensive                                                           |
|           | 32,34,35    | CZE-UV   | 2.09        | 20-100               | Limited sensitivity                                                              |
|           | 19,24-29    | HPLC-UV  | 0.2         | 0.2-32               | Complicated and onerous in time and money                                        |
| RFP       | This work   | MEKC-DAD | 0.840       | 3.708-74.160         | Simple and inexpensive                                                           |
|           | 30,32,34,35 | CZE-UV   | 4.79        | 40-100               | Limited sensitivity                                                              |
|           | 19,24-29    | HPLC-UV  | 0.1         | 0.1-16               | Complicated and onerous in time and money                                        |

INH: isoniazid; PZA: pyrazinamide; RFP: rifampicin; LOQ: limit of quantification; MEKC: micellar electrokinetic capillary chromatography; DAD: diode array detector; CE: capillary electrophoresis; CL: chemiluminescence; CZE: ; UV: ultraviolet; HPLC: High performance liquid chromatography.
